# Supplementary material for: Multiple measures could alleviate long-branch attraction in phylogenomic reconstruction of Cupressoideae (Cupressaceae)
Source: PubMed Central journal article supplement (PMC5264392; doi:10.1038/srep41005), 2017-01-25
Supplement: srep41005-s1.pdf [file srep41005-s1.pdf]

## Supplementary Figures and Tables

### **Multiple measures could alleviate long-branch attraction in phylogenomic reconstruction of Cupressoideae (Cupressaceae)**

Xiaojian Qu<sup>1,2</sup>, Jianjun Jin<sup>1,2</sup>, Dezhu Li<sup>1\*</sup> & Tingshuang Yi<sup>1\*</sup>

<sup>1</sup>Plant Germplasm and Genomics Center, Germplasm Bank of Wild Species, Kunming Institute of Botany, Chinese Academy of Sciences, Kunming, Yunnan, 650201, China,

<sup>2</sup>Kunming College of Life Sciences, University of Chinese Academy of Sciences, Kunming, Yunnan, 650201, China.

\*Correspondence and requests for materials should be addressed to D.L. (email: [dzl@mail.kib.ac.cn](mailto:dzl@mail.kib.ac.cn)) and T.Y. (email: [tingshuangyi@mail.kib.ac.cn](mailto:tingshuangyi@mail.kib.ac.cn)).

**Supplementary Figure S1. Phylogenies of Cupressoideae inferred from multiple maximum likelihood (ML) analyses under GTRGAMMA model.** Support for the branches was estimated from 1,000 bootstrapping replicates. The bootstrap values are shown on branches, and bootstrap values of 100% are not shown. The trees are from analyses of PCG12, AA, PCG-GB-relaxed, PCG-GB-default, PCG-GB-strict, PCG-Iss-9, PCG-slope-12, PCG-slope-70, PCG-R<sup>2</sup>-11, PCG-R<sup>2</sup>-71, PCG-OV-slow-partition, PCG-OV-fast-partition, PCG-OV-medium-partition, PCG-TIGER-slow-partition, PCG-TIGER-fast-partition, PCG-TIGER-medium-partition, PCG-OV-sorted, PCG-GTR-CAT and PCG-ASTRAL.

(a) PCG12

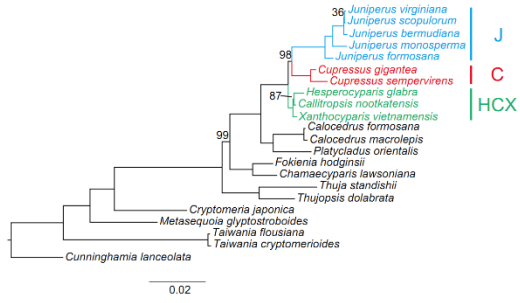

(b) AA

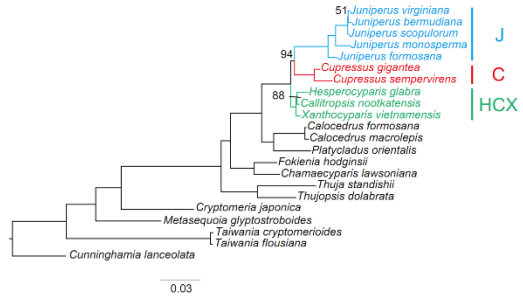

(c) PCG-GB-relaxed

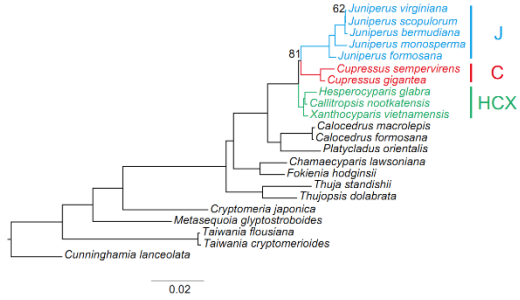

(c) PCG-GB-default

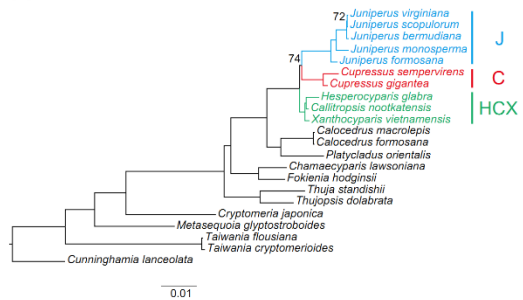

(c) PCG-GB-strict

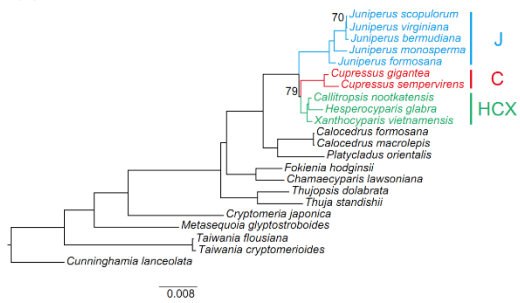

(d) PCG-Iss-9

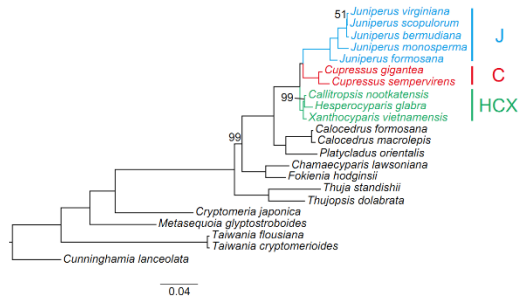

(e) PCG-slope-12

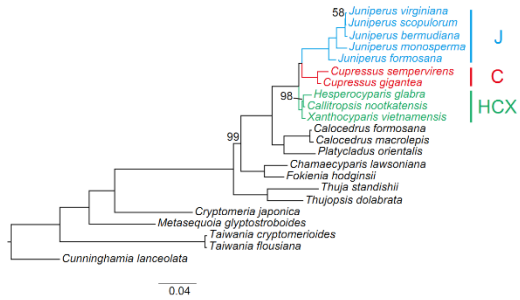

(e) PCG-slope-70

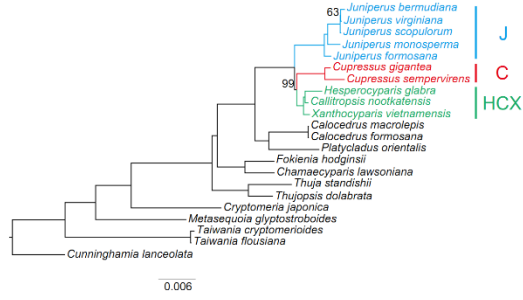

(f) PCG-R<sup>2</sup>-11

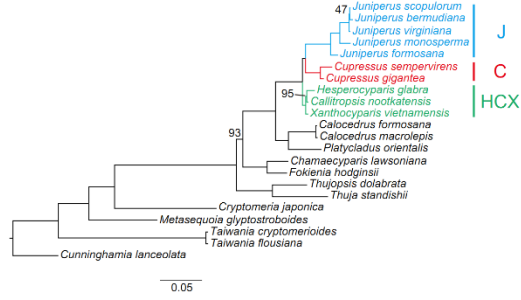

(f) PCG-R<sup>2</sup>-71

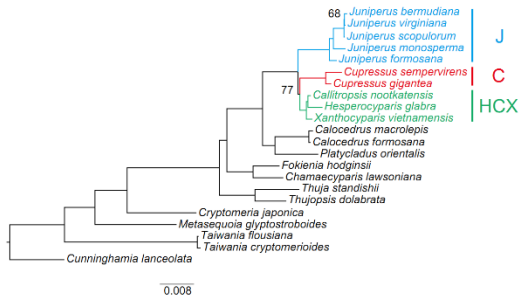

(g) PCG-OV-slow-partition

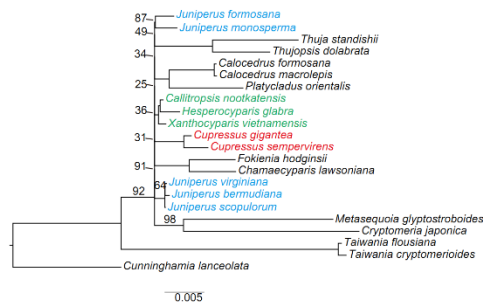

(g) PCG-OV-fast-partition

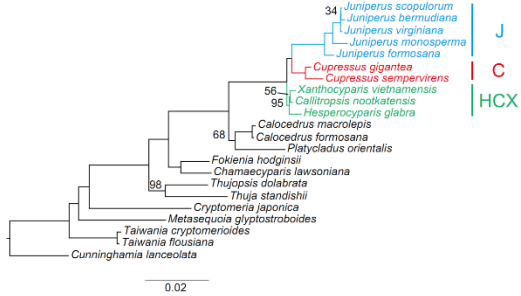

(g) PCG-OV-medium-partition

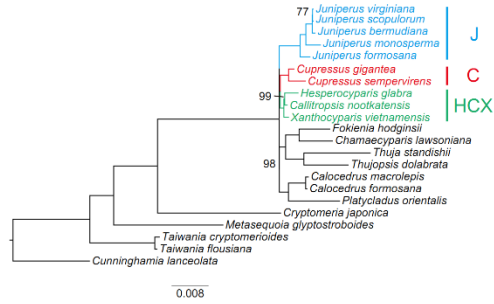

(h) PCG-TIGER-slow-partition

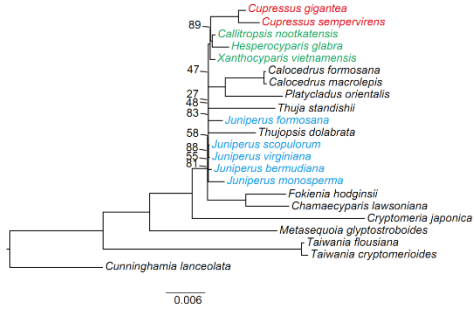

(h) PCG-TIGER-fast-partition

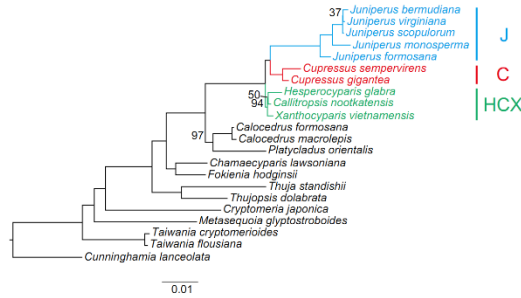

(h) PCG-TIGER-medium-partition

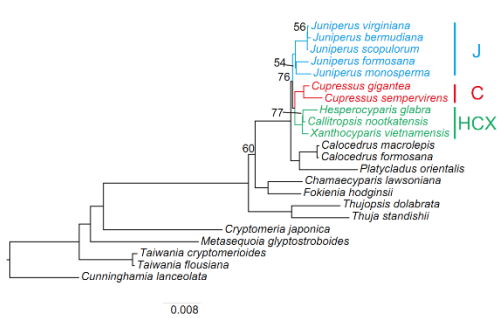

(i) PCG-OV-sorted

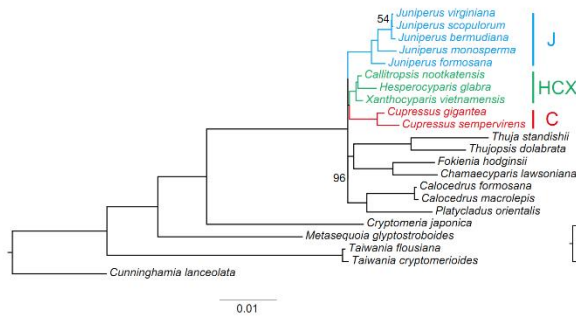

(j) PCG-GTR-CAT

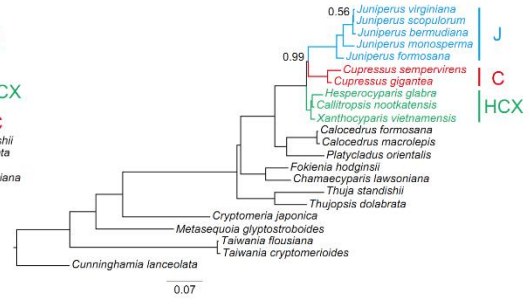

(k) PCG-ASTRAL

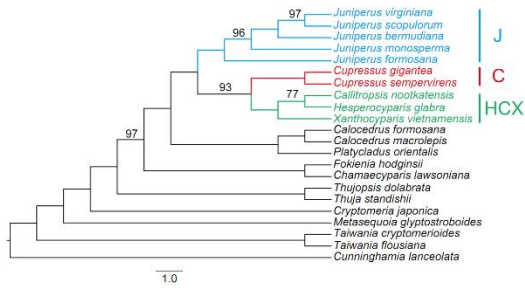

**Supplementary Figure S2. Density plots of gene-specific saturation indices for the 82 PCG genes.** (a) Slopes of the linear regression between patristic and uncorrected pairwise distances. (b)  $R^2$  for the linear regression between patristic and uncorrected pairwise distances. Dashed line indicates the starting shoulder value. Red areas in the left-hand side are genes that might be saturated.

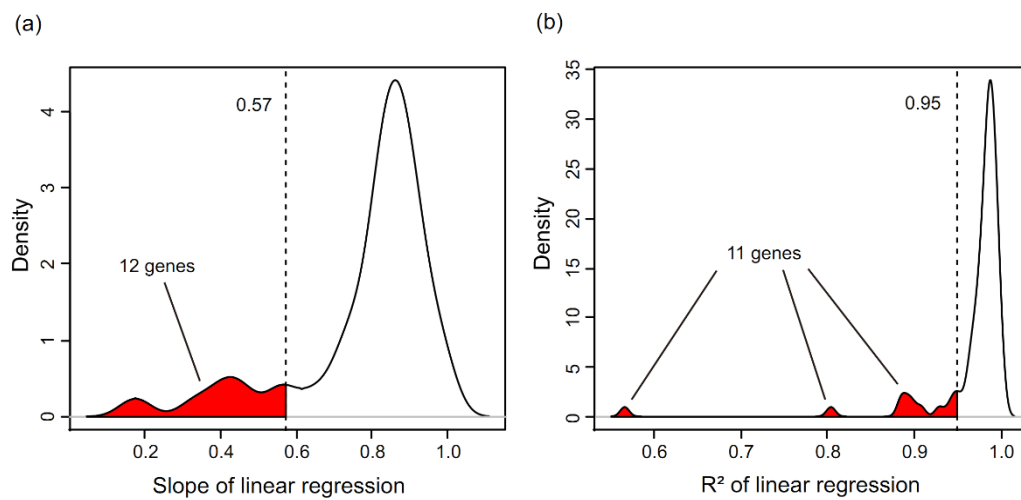

**Supplementary Figure S3. Estimated evolutionary rates for nucleotide sites in the concatenated PCG data set.** Parsimony informative sites in the concatenated dataset were sorted by the Observed Variability (OV) method or the Tree Independent Generation of Evolutionary Rates (TIGER) method and divided into three equal partitions.

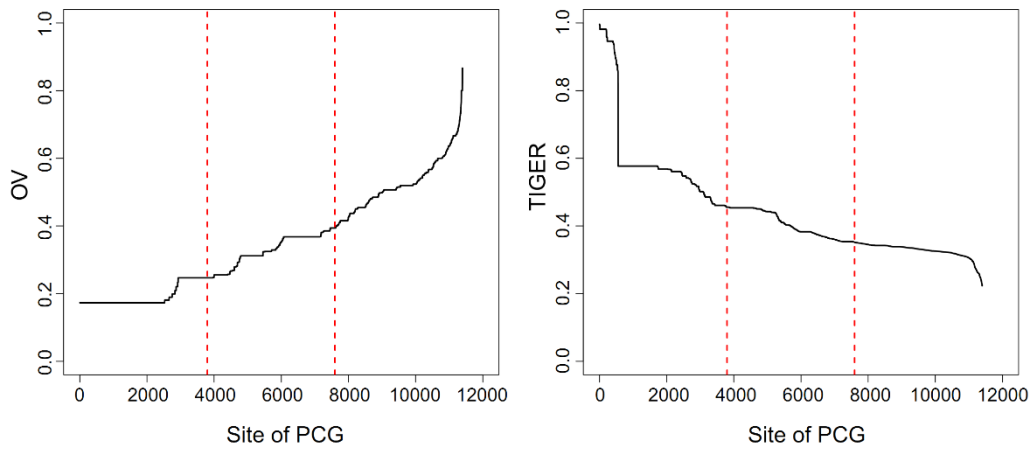

**Supplementary Figure S4. OV-sorting analysis.** (a) Bootstrap support in ML phylogenetic reconstruction for three alternative relationships. Digits on the y-axis indicate bootstrap support values, and on the x-axis indicate length of A partitions. (b) Pearson correlation analyses. The blue dotted line indicates the Pearson correlation coefficient ( $r$ ) of ML distances for A (conserved) and B (varied) partitions. The red dotted line represents the  $r$  value for uncorrected  $p$  distances and ML distances for the B partition. The optimal stopping point for varied site removal was identified at position 77,173. Digits on the y-axis indicate Pearson correlation coefficient and digits on the x-axis indicate length of A partitions.



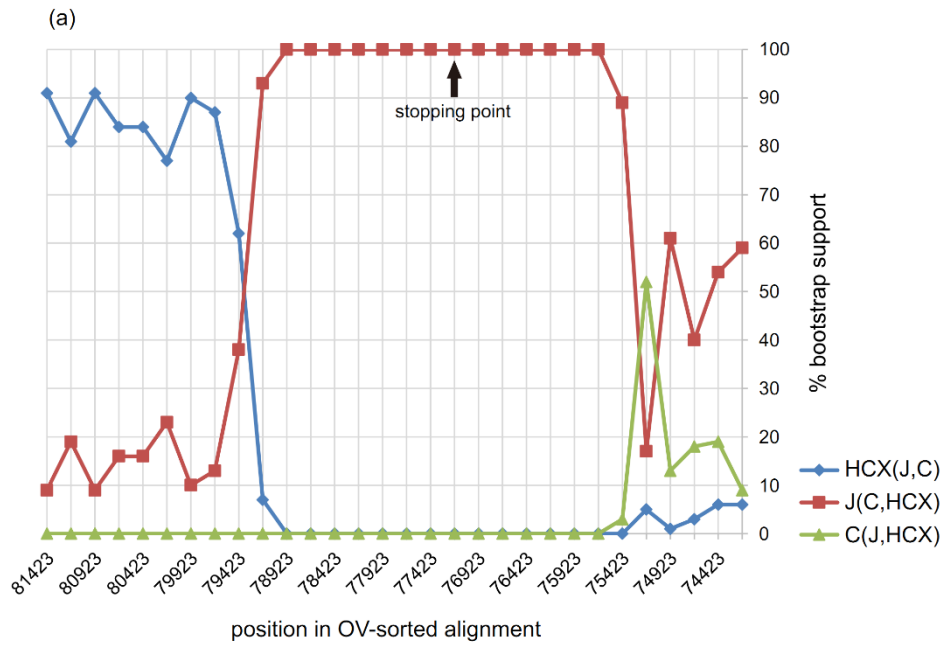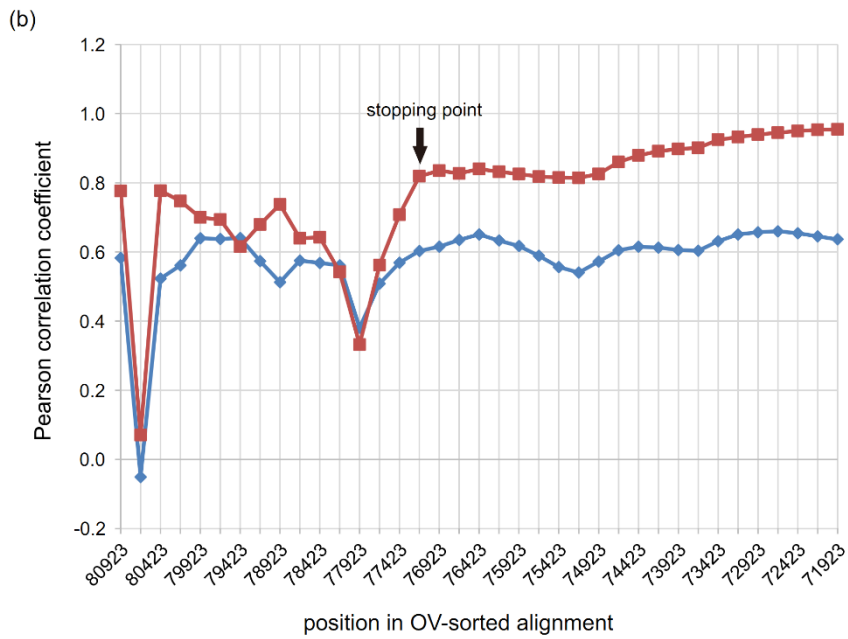

**Supplementary Figure S5. Chronogram of Cupressoideae based on the PCG matrix inferred by using treePL.** Blue bars represent the minimum and maximum estimation of node ages. Red dots represent fossil calibration points in Supplementary Table S3. Red line indicates the Cretaceous/Tertiary boundary.

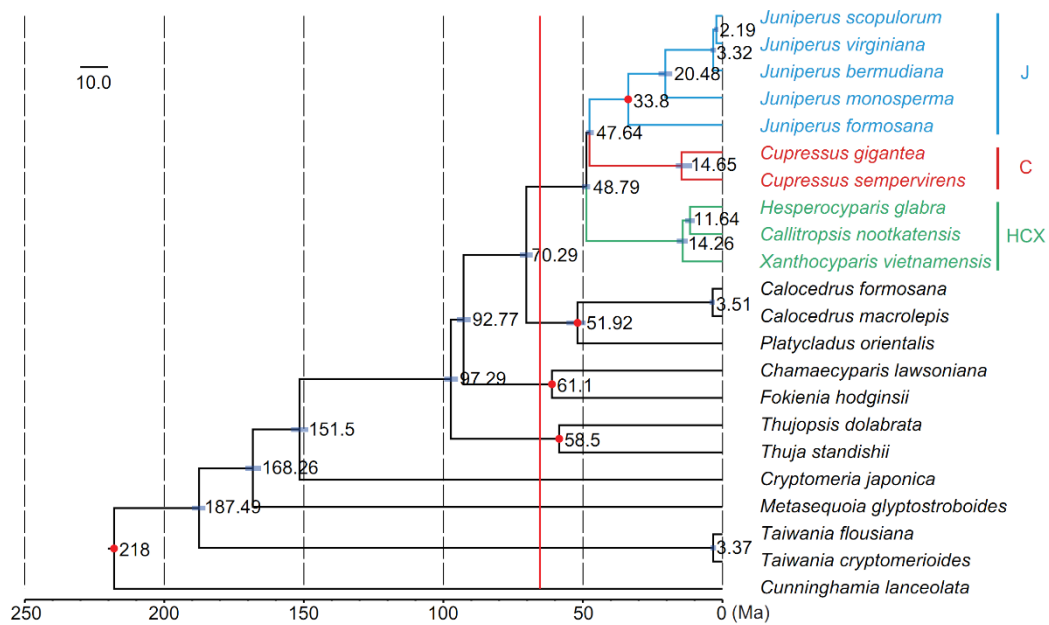

**Supplementary Table S1. Cupressaceae taxa sampled in this study.** The plastome sequences from KX832620 to KX832629 were generated in this study.

| <b>Subfamily</b>  | <b>Species</b>                      | <b>Accession no.</b> | <b>Collection no.</b> |
|-------------------|-------------------------------------|----------------------|-----------------------|
| Cupressoideae     | <i>Callitropsis nootkatensis</i>    | NC_026295            | -                     |
|                   | <i>Calocedrus formosana</i>         | KX832620             | Yi16045               |
|                   | <i>Calocedrus macrolepis</i>        | KX832621             | Yi16046               |
|                   | <i>Chamaecyparis lawsoniana</i>     | KX832622             | Yi16050               |
|                   | <i>Cupressus gigantea</i>           | NC_028155            | -                     |
|                   | <i>Cupressus sempervirens</i>       | NC_026296            | -                     |
|                   | <i>Fokienia hodginsii</i>           | KX832623             | Yi16052               |
|                   | <i>Hesperocyparis glabra</i>        | KX832624             | Yi16053               |
|                   | <i>Juniperus bermudiana</i>         | NC_024021            | -                     |
|                   | <i>Juniperus formosana</i>          | KX832625             | Yi16054               |
|                   | <i>Juniperus monosperma</i>         | NC_024022            | -                     |
|                   | <i>Juniperus scopulorum</i>         | NC_024023            | -                     |
|                   | <i>Juniperus virginiana</i>         | NC_024024            | -                     |
|                   | <i>Platycladus orientalis</i>       | KX832626             | Yi16058               |
|                   | <i>Thuja standishii</i>             | KX832627             | Yi16059               |
|                   | <i>Thujopsis dolabrata</i>          | KX832628             | Yi16060               |
|                   | <i>Xanthocyparis vietnamensis</i>   | KX832629             | Yi16061               |
| Cunninghamioideae | <i>Cunninghamia lanceolata</i>      | NC_021437            | -                     |
| Sequoioideae      | <i>Metasequoia glyptostroboides</i> | NC_027423            | -                     |
| Taiwanoideae      | <i>Taiwania cryptomerioides</i>     | NC_016065            | -                     |
|                   | <i>Taiwania flousiana</i>           | NC_021441            | -                     |
| Taxodioideae      | <i>Cryptomeria japonica</i>         | NC_010548            | -                     |

**Supplementary Table S2. Index of substitution saturation (Iss) values of 82 protein-coding genes for 22 Cupressaceae species.** Iss: an entropy-based index of substitution saturation. Iss.c: the critical value of Iss. \*: Iss value was greater than Iss.c value.

| Order | Gene         | Iss    | Iss.c (symmetrical tree) | <i>P</i> -value | Iss.c (asymmetrical tree) | <i>P</i> -value |
|-------|--------------|--------|--------------------------|-----------------|---------------------------|-----------------|
| 1     | <i>petN</i>  | 0.0142 | 0.4176                   | 0               | 0.3619                    | 0               |
| 2     | <i>psbL</i>  | 0.0156 | 0.4865                   | 0               | 0.3555                    | 0               |
| 3     | <i>petG</i>  | 0.0167 | 0.4802                   | 0               | 0.3555                    | 0               |
| 4     | <i>psbN</i>  | 0.0169 | 0.5144                   | 0               | 0.3571                    | 0               |
| 5     | <i>rbcL</i>  | 0.0366 | 0.7827                   | 0               | 0.563                     | 0               |
| 6     | <i>psbI</i>  | 0.0379 | 0.4736                   | 0               | 0.3556                    | 0               |
| 7     | <i>ycf3</i>  | 0.0382 | 0.7151                   | 0               | 0.4645                    | 0               |
| 8     | <i>psaB</i>  | 0.0434 | 0.797                    | 0               | 0.5961                    | 0               |
| 9     | <i>ndhE</i>  | 0.0514 | 0.6571                   | 0               | 0.4127                    | 0               |
| 10    | <i>ndhA</i>  | 0.0571 | 0.7719                   | 0               | 0.54                      | 0               |
| 11    | <i>ndhJ</i>  | 0.0574 | 0.7179                   | 0               | 0.4665                    | 0               |
| 12    | <i>ndhB</i>  | 0.0649 | 0.7841                   | 0               | 0.5659                    | 0               |
| 13    | <i>atpH</i>  | 0.0659 | 0.6281                   | 0               | 0.3939                    | 0               |
| 14    | <i>psaC</i>  | 0.066  | 0.6281                   | 0               | 0.3939                    | 0               |
| 15    | <i>psaA</i>  | 0.0699 | 0.7979                   | 0               | 0.5974                    | 0               |
| 16    | <i>psbA</i>  | 0.0707 | 0.77                     | 0               | 0.536                     | 0               |
| 17    | <i>rps7</i>  | 0.0719 | 0.7064                   | 0               | 0.456                     | 0               |
| 18    | <i>psbK</i>  | 0.0748 | 0.5826                   | 0               | 0.3727                    | 0               |
| 19    | <i>ndhC</i>  | 0.0777 | 0.6793                   | 0               | 0.4302                    | 0               |
| 20    | <i>petA</i>  | 0.0782 | 0.7653                   | 0               | 0.5268                    | 0               |
| 21    | <i>rpl14</i> | 0.0783 | 0.6812                   | 0               | 0.4318                    | 0               |
| 22    | <i>psbD</i>  | 0.0806 | 0.77                     | 0               | 0.536                     | 0               |
| 23    | <i>psbB</i>  | 0.0827 | 0.7849                   | 0               | 0.5687                    | 0               |
| 24    | <i>petB</i>  | 0.085  | 0.7395                   | 0               | 0.4866                    | 0               |
| 25    | <i>rps8</i>  | 0.0873 | 0.6899                   | 0               | 0.4397                    | 0               |
| 26    | <i>ndhH</i>  | 0.0895 | 0.7748                   | 0               | 0.5462                    | 0               |
| 27    | <i>psbH</i>  | 0.0957 | 0.6166                   | 0               | 0.3876                    | 0               |
| 28    | <i>atpI</i>  | 0.0966 | 0.7502                   | 0               | 0.5009                    | 0               |
| 29    | <i>chlB</i>  | 0.0973 | 0.785                    | 0               | 0.5696                    | 0               |
| 30    | <i>psbC</i>  | 0.0975 | 0.7825                   | 0               | 0.5626                    | 0               |
| 31    | <i>rps14</i> | 0.0985 | 0.6571                   | 0               | 0.4127                    | 0               |
| 32    | <i>ycf4</i>  | 0.1007 | 0.7248                   | 0               | 0.4719                    | 0               |
| 33    | <i>psbZ</i>  | 0.1026 | 0.5854                   | 0               | 0.3738                    | 0               |
| 34    | <i>psbE</i>  | 0.1118 | 0.6351                   | 0               | 0.398                     | 0               |
| 35    | <i>rpl36</i> | 0.1151 | 0.4802                   | 0               | 0.3555                    | 0               |
| 36    | <i>chlN</i>  | 0.116  | 0.7815                   | 0               | 0.5604                    | 0               |
| 37    | <i>rpl2</i>  | 0.1253 | 0.7572                   | 0               | 0.5121                    | 0               |
| 38    | <i>atpF</i>  | 0.1254 | 0.7254                   | 0               | 0.4724                    | 0               |
| 39    | <i>psbF</i>  | 0.1254 | 0.4925                   | 0.0001          | 0.3557                    | 0.0069          |

|    |               |        |        |        |        |        |
|----|---------------|--------|--------|--------|--------|--------|
| 40 | <i>chlL</i>   | 0.1287 | 0.7601 | 0      | 0.517  | 0      |
| 41 | <i>atpE</i>   | 0.1394 | 0.6939 | 0      | 0.4435 | 0      |
| 42 | <i>rpl33</i>  | 0.1429 | 0.5961 | 0      | 0.378  | 0      |
| 43 | <i>rps11</i>  | 0.1455 | 0.6899 | 0      | 0.4397 | 0      |
| 44 | <i>rps15</i>  | 0.1465 | 0.64   | 0      | 0.401  | 0.0001 |
| 45 | <i>cemA</i>   | 0.1486 | 0.7538 | 0      | 0.5064 | 0      |
| 46 | <i>psbM</i>   | 0.1511 | 0.4736 | 0      | 0.3556 | 0      |
| 47 | <i>atpA</i>   | 0.1533 | 0.7849 | 0      | 0.5686 | 0      |
| 48 | <i>ndhF</i>   | 0.1613 | 0.7977 | 0      | 0.597  | 0      |
| 49 | <i>ndhG</i>   | 0.1637 | 0.723  | 0      | 0.4705 | 0      |
| 50 | <i>ndhI</i>   | 0.1747 | 0.7112 | 0      | 0.4611 | 0      |
| 51 | <i>psbT</i>   | 0.1904 | 0.4667 | 0.0035 | 0.3559 | 0.0603 |
| 52 | <i>rps4</i>   | 0.1993 | 0.7387 | 0      | 0.4857 | 0      |
| 53 | <i>petL</i>   | 0.2013 | 0.4357 | 0.0054 | 0.3589 | 0.0495 |
| 54 | <i>psaM</i>   | 0.2025 | 0.452  | 0      | 0.357  | 0.0079 |
| 55 | <i>atpB</i>   | 0.2092 | 0.785  | 0      | 0.5691 | 0      |
| 56 | <i>psaI</i>   | 0.22   | 0.4736 | 0      | 0.3556 | 0.0194 |
| 57 | <i>matK</i>   | 0.2219 | 0.7852 | 0      | 0.5707 | 0      |
| 58 | <i>ndhK</i>   | 0.2366 | 0.7552 | 0      | 0.5087 | 0      |
| 59 | <i>rps2</i>   | 0.2451 | 0.7471 | 0      | 0.4963 | 0      |
| 60 | <i>ndhD</i>   | 0.2729 | 0.7849 | 0      | 0.5689 | 0      |
| 61 | <i>rps19</i>  | 0.2812 | 0.6597 | 0      | 0.4145 | 0.1181 |
| 62 | <i>rpl20</i>  | 0.2895 | 0.6774 | 0      | 0.4286 | 0.0658 |
| 63 | <i>psaJ</i>   | 0.3104 | 0.5193 | 0.1521 | 0.3577 | 0.7439 |
| 64 | <i>rps12</i>  | 0.3325 | 0.6848 | 0.0014 | 0.4351 | 0.3414 |
| 65 | <i>rpl23</i>  | 0.336  | 0.6584 | 0.002  | 0.4136 | 0.4495 |
| 66 | <i>psbJ</i>   | 0.3522 | 0.4983 | 0.127  | 0.3559 | 0.969  |
| 67 | <i>ccsA</i>   | 0.4041 | 0.7656 | 0      | 0.5274 | 0.0494 |
| 68 | <i>infA</i>   | 0.4557 | 0.6446 | 0.0527 | 0.404  | 0.5939 |
| 69 | <i>petD</i>   | 0.4929 | 0.7158 | 0.1791 | 0.465  | 0.8661 |
| 70 | <i>rpoB</i>   | 0.5052 | 0.8089 | 0      | 0.6209 | 0.0042 |
| 71 | <i>rpoA</i>   | 0.5057 | 0.7709 | 0      | 0.5379 | 0.6189 |
| 72 | <i>rpl16</i>  | 0.6311 | 0.7025 | 0.6574 | 0.452  | 0.2674 |
| 73 | <i>rpoC1</i>  | 0.6989 | 0.7999 | 0.0505 | 0.6005 | 0.0568 |
| 74 | <i>rpoC2*</i> | 0.7345 | 0.8095 | 0.0308 | 0.6262 | 0.0019 |
| 75 | <i>ycf2*</i>  | 0.8376 | 0.8389 | 0.9496 | 0.6405 | 0      |
| 76 | <i>rps3*</i>  | 1.0073 | 0.7518 | 0.0302 | 0.5033 | 0      |
| 77 | <i>rpl22*</i> | 1.1283 | 0.7172 | 0      | 0.466  | 0      |
| 78 | <i>clpP*</i>  | 1.1514 | 0.7729 | 0      | 0.542  | 0      |
| 79 | <i>ycf1*</i>  | 1.1606 | 0.8414 | 0      | 0.6404 | 0      |
| 80 | <i>rpl32*</i> | 1.3362 | 0.6976 | 0      | 0.4471 | 0      |
| 81 | <i>accD*</i>  | 1.4705 | 0.8085 | 0      | 0.6188 | 0      |
| 82 | <i>rps18*</i> | 1.9964 | 0.7371 | 0      | 0.4839 | 0      |

**Supplementary Table S3. Fossil calibrations implemented in this study.** Detailed fossil calibration for these five nodes are in Materials and Methods. Ma: million years ago. MRCA: most recent common ancestor.

| <b>Calibration point</b>                         | <b>Assigned minimum age (Ma)</b> | <b>Note</b>                                     |
|--------------------------------------------------|----------------------------------|-------------------------------------------------|
| Crown of Cupressoideae                           | 157.2                            | Justification by Mao <i>et al.</i> <sup>1</sup> |
| Crown of <i>Thuja-Thujaopsis</i> clade           | 58.5                             | Justification by Mao <i>et al.</i> <sup>1</sup> |
| Crown of <i>Chamaecyparis-Fokienia</i> clade     | 61.1                             | Justification by Mao <i>et al.</i> <sup>1</sup> |
| MRCA of <i>Platycladus</i> and <i>Calocedrus</i> | 28.3                             | Justification by Mao <i>et al.</i> <sup>1</sup> |
| Crown of <i>Juniperus</i>                        | 33.8                             | Justification by Mao <i>et al.</i> <sup>1</sup> |

1. Mao, K. S. *et al.* Distribution of living Cupressaceae reflects the breakup of Pangea. *Proc. Natl. Acad. Sci. USA* **109**, 7793-7798 (2012).

**Supplementary Table S4. The estimated divergence time for the Cupressoideae clades based on the PCG matrix.** Penalized likelihood (PL) point represents the point age estimation in the maximum likelihood best tree. PL min and PL max represent the minimum and maximum estimations from 1,000 maximum likelihood bootstrap trees. Ma: million years ago. MRCA: most recent common ancestor. J-C-HCX: *Juniperus-Cupressus-Hesperocyparis-Callitropsis-Xanthocyparis*.

| <b>Clade</b>                                          | <b>PL point<br/>(Ma)</b> | <b>PL min<br/>(Ma)</b> | <b>PL max<br/>(Ma)</b> |
|-------------------------------------------------------|--------------------------|------------------------|------------------------|
| Crown of Cupressoideae                                | 97.29                    | 94.73                  | 99.65                  |
| Crown of <i>Thuja-Thujaopsis</i> clade                | 58.50                    | 58.50                  | 58.50                  |
| MRCA of <i>Chamaecyparis</i> and <i>Juniperus</i>     | 92.77                    | 90.25                  | 95.10                  |
| Crown of <i>Chamaecyparis-Fokienia</i> clade          | 61.10                    | 61.10                  | 61.10                  |
| MRCA of <i>Platycladus</i> and <i>Juniperus</i>       | 70.29                    | 68.03                  | 72.60                  |
| MRCA of <i>Platycladus</i> and <i>Calocedrus</i>      | 51.92                    | 49.02                  | 55.75                  |
| Crown of J-C-HCX clade                                | 48.79                    | 47.48                  | 50.29                  |
| Crown of J-C subclade                                 | 47.64                    | 46.16                  | 48.87                  |
| Crown of <i>Juniperus</i>                             | 33.80                    | 33.80                  | 33.80                  |
| Crown of HCX subclade                                 | 14.26                    | 12.36                  | 16.23                  |
| MRCA of <i>Hesperocyparis</i> and <i>Callitropsis</i> | 11.64                    | 10.05                  | 13.30                  |
